# Supplementary material
Source: PubMed Central journal article supplement (PMC3475368)
Supplement: ismej201247x2.pdf [file ismej201247x2.pdf]

Table S2: Number of tags sequenced from orders within the Proteobacteria in each sample from the Great Sippewissett Marsh sediments. Samples designated ENV1-ENV6 are environmental replicates sampled within 100 cm<sup>2</sup> region of the sediments associated with the tall from of *Spartina alterniflora*. The HOM1 and HOM2 are subsampled from 12 pooled and homogenized sediment samples from the same 100 cm<sup>2</sup> area of the marsh. Data are normalized to the most abundant sample (ENV1: 24,675 sequences).

|                    | ENV1 | ENV2 | ENV3 | ENV4 | ENV5 | ENV6 | HOM1 | HOM2 | Total |
|--------------------|------|------|------|------|------|------|------|------|-------|
| Caulobacterales    | 259  | 200  | 120  | 390  | 139  | 169  | 176  | 223  | 1676  |
| Kiloniellales      | 4    | 0    | 0    | 2    | 1    | 0    | 4    | 9    | 20    |
| Kordiimonadales    | 18   | 6    | 7    | 35   | 15   | 15   | 10   | 20   | 126   |
| Parvularculales    | 86   | 45   | 47   | 90   | 42   | 53   | 66   | 80   | 509   |
| Rhizobiales        | 661  | 762  | 557  | 798  | 501  | 527  | 519  | 534  | 4859  |
| Rhodobacterales    | 1829 | 1783 | 1373 | 1399 | 1507 | 1455 | 1400 | 1300 | 12046 |
| Rhodospirillales   | 1053 | 1389 | 849  | 1110 | 1092 | 983  | 940  | 1057 | 8473  |
| Rickettsiales      | 94   | 53   | 47   | 105  | 60   | 67   | 62   | 69   | 557   |
| Sneathiellales     | 175  | 243  | 63   | 386  | 157  | 160  | 113  | 166  | 1463  |
| Sphingomonadales   | 190  | 131  | 81   | 312  | 133  | 118  | 137  | 95   | 1197  |
| unidentified alpha | 484  | 382  | 230  | 501  | 375  | 339  | 325  | 387  | 3023  |

|                     |      |      |      |      |      |      |      |      |       |
|---------------------|------|------|------|------|------|------|------|------|-------|
| Burkholderiales     | 47   | 22   | 50   | 18   | 31   | 29   | 33   | 23   | 253   |
| Hydrogenophilales   | 64   | 93   | 107  | 46   | 65   | 85   | 71   | 114  | 645   |
| Methylophilales     | 5    | 4    | 3    | 31   | 4    | 10   | 2    | 2    | 61    |
| Neisseriales        | 1    | 0    | 0    | 1    | 1    | 1    | 3    | 1    | 8     |
| Nitrosomonadales    | 119  | 131  | 197  | 43   | 96   | 150  | 80   | 133  | 949   |
| Rhodocyclales       | 59   | 57   | 172  | 32   | 45   | 36   | 60   | 123  | 584   |
| unidentified Beta   | 1    | 5    | 8    | 5    | 3    | 1    | 8    | 10   | 41    |
| Bdellovibrionales   | 163  | 176  | 170  | 217  | 187  | 161  | 179  | 137  | 1390  |
| Desulfarculales     | 11   | 21   | 13   | 17   | 18   | 12   | 28   | 17   | 137   |
| Desulfobacterales   | 207  | 208  | 165  | 182  | 234  | 235  | 222  | 237  | 1690  |
| Desulfovibrionales  | 56   | 62   | 34   | 35   | 76   | 50   | 53   | 45   | 411   |
| Desulfurellales     | 5    | 4    | 6    | 2    | 8    | 2    | 2    | 9    | 38    |
| Desulfuromonadales  | 92   | 90   | 67   | 81   | 93   | 91   | 100  | 54   | 668   |
| Myxococcales        | 2046 | 3050 | 1176 | 1745 | 2577 | 2562 | 1878 | 1421 | 16455 |
| SAR324              | 56   | 54   | 78   | 61   | 79   | 47   | 64   | 43   | 482   |
| Syntrophobacterales | 25   | 38   | 28   | 29   | 39   | 37   | 24   | 37   | 257   |
| unidentified delta  | 1211 | 2382 | 1391 | 963  | 2038 | 1852 | 1386 | 1768 | 12991 |

|                      |     |     |     |     |     |     |     |     |      |
|----------------------|-----|-----|-----|-----|-----|-----|-----|-----|------|
| Campylobacterales    | 9   | 13  | 11  | 9   | 18  | 18  | 10  | 6   | 94   |
| Nautiliales          | 43  | 21  | 19  | 43  | 30  | 33  | 42  | 47  | 278  |
| unidentified epsilon | 7   | 2   | 1   | 6   | 2   | 3   | 4   | 4   | 29   |
| Acidithiobacillales  | 85  | 64  | 56  | 33  | 52  | 49  | 57  | 70  | 466  |
| Aeromonadales        | 1   | 21  | 4   | 2   | 4   | 2   | 1   | 2   | 37   |
| Alteromonadales      | 401 | 145 | 382 | 474 | 339 | 204 | 393 | 573 | 2911 |
| Cardiobacteriales    | 8   | 2   | 4   | 1   | 0   | 3   | 3   | 2   | 23   |
| Chromatiales         | 211 | 160 | 280 | 204 | 244 | 196 | 230 | 280 | 1805 |
| Enterobacteriales    | 52  | 11  | 29  | 45  | 34  | 28  | 53  | 67  | 319  |
| Legionellales        | 96  | 26  | 89  | 89  | 47  | 29  | 68  | 46  | 490  |
| Methylococcales      | 12  | 5   | 14  | 12  | 10  | 6   | 10  | 8   | 77   |
| Oceanospirillales    | 365 | 173 | 222 | 278 | 178 | 175 | 209 | 256 | 1856 |
| Pasteurellales       | 6   | 5   | 6   | 8   | 2   | 5   | 5   | 4   | 41   |
| Pseudomonadales      | 141 | 40  | 202 | 103 | 141 | 101 | 115 | 144 | 987  |
| Salinisphaerales     | 2   | 0   | 3   | 2   | 1   | 2   | 1   | 1   | 12   |
| Thiotrichales        | 221 | 116 | 224 | 195 | 174 | 147 | 205 | 231 | 1513 |
| Vibrionales          | 8   | 48  | 7   | 20  | 11  | 7   | 7   | 10  | 118  |

|                    |      |      |      |      |      |      |      |      |       |
|--------------------|------|------|------|------|------|------|------|------|-------|
| Xanthomonadales    | 2509 | 1652 | 2356 | 1632 | 2482 | 2065 | 2234 | 2992 | 17922 |
| unidentified gamma | 1525 | 935  | 1482 | 1011 | 1316 | 934  | 1347 | 1704 | 10254 |
